# Supplementary material for: 3D Bone Biomimetic Scaffolds for Basic and Translational Studies with Mesenchymal Stem Cells
Source: MDPI journal article supplement (doi:10.3390/ijms19103150), 2018-10-13
Supplement: s1 [file s1]

## **Acronyms used in the text and corresponding spelling in alphabetical order**

2D: two-dimensional

3D: three-dimensional

AcvR2a: Activin A Receptor Type 2A

AEF: aligned electrospun fiber

AKT: Protein kinase B

bFGF: basic fibroblast growth factor

Bioink: biocompatible ink

BMP2: Bone Morphogenetic Protein 2

BMPs: Bone Morphogenetic Proteins

CaSO<sub>4</sub>: Calcium sulfate

COX2: cyclooxygenase-2

ECM: extracellular matrix

FGF: Fibroblast Growth Factor

FGF9: Fibroblast Growth Factor 9

GFP: Green Fluorescent Protein

GFs: Growth Factors

HA/TCP: HA/tricalcium phosphate

HA: hydroxyapatite

HGF: Hepatocyte growth factor

hMSCs: human Mesenchymal Stem Cells

HSC: Hematopoietic Stem Cell

HUVEC: Human Umbilical Vein Endothelial Cells

IGF-I: Insulin-like Growth Factor-I

IGF-II: Insulin-like Growth Factor-II

iNOS: inducible Nitric Oxide Synthase

LH: Large Hexagonal

LIPUS: Low Intensity Pulsed Ultrasound Stimulation

LS: Large Square

MAPK: Mitogen-Activated Protein Kinase

MEF: Mesh Electrospun Fiber

Mg<sup>2+</sup>: Magnesium ion

MgApRCP: mineralized, magnesium-doped recombinant type I collagen enriched with the RGD sequence

MgCHA: magnesium and carbonate hydroxyapatite

MgHA/Coll: Magnesium-doped hydroxyapatite and type I collagen

miRNAs: microRNA

Mmp13: Matrix Metalloproteinase 13

Mmp2: Matrix Metalloproteinase 2

MPa: Megapascal

MSCs: Mesenchymal Stem Cells

MT: Masson's Trichrome

NCs: nasal chondrocytes

NF-κB: nuclear factor of kappa light polypeptide gene enhancer in B cells

NSG: NOD scid gamma

PCL: poly(ε-caprolactone)

PGE2: Prostaglandin E2

PI3K: Phosphoinositide 3 kinase

PLGA: poly-lactic-co-glycolic acid

PLLA: poly-L-lactic acid

PSR: PicroSirius Red

RANKL: Receptor activator of nuclear factor kappa-B ligand

RCP: Recombinant Collagen Peptide

REF: Random Electrospun Fiber

RGD: Arginine-Glycine-Aspartic acid

RGDS: Arginine-Glycine-Aspartic acid-Serine

Runx2: Runt-related transcription factor 2

SH: Small Hexagonal

Smad5: SMAD Family Member 5

SS: Small Square

TGF $\beta$ : Transforming Growth Factor beta

TGF $\beta$ 3: Transforming Growth Factor beta-3

TSG6: TNF-Stimulated Gene 6 protein

V-Cam1: Vascular Cell adhesion molecule 1

VEGF: Vascular-Endothelial Growth Factor

WT: Wild Type

YAP/TAZ: Yes-associated protein/Tafazzin

Zo-1: Zonula occludens-1
